# Supplementary material for: Tailored Polymer-Based Selective Extraction of Lipid Mediators from Biological Samples
Source: MDPI journal article supplement (doi:10.3390/metabo11080539), 2021-08-13
Supplement: s1 [file s1]

## Supplementary materials

### Title: Tailored polymer-based selective extraction of oxylipins from biological samples

#### Authors:

Yohannes Abere Ambaw<sup>1,2,3</sup>, Sandra Rinne Dahl<sup>4,5</sup>, Yan Chen<sup>4</sup>, Tyge Greibrokk<sup>4</sup>, Elsa Lundanes<sup>4</sup>, Issam Lazraq<sup>6</sup>, Sudhirkumar Shinde<sup>6</sup>, Jayashree Selvalatchmanan<sup>1,2</sup>, Markus R Wenk<sup>1,2</sup>, Börje Sellergren<sup>6\*</sup> and Federico Torta<sup>1,2\*</sup>

#### Affiliations:

<sup>1</sup>Department of Biochemistry, Yong Loo Lin School of Medicine, National University of Singapore, <sup>2</sup>SLING, Singapore Lipidomics Incubator, Life Sciences Institute, National University of Singapore, Singapore, <sup>3</sup>Department of Molecular Metabolism, Harvard T.H.Chan School of Public Health, Harvard University, USA, <sup>4</sup>Department of Chemistry, University of Oslo, Norway, <sup>5</sup>Hormone Laboratory, Department of Medical Biochemistry, Oslo University Hospital, Norway, <sup>6</sup>Department of Biomedical Sciences, Biofilms Research Center for Biointerfaces, Faculty of Health and Society, Malmö University, Sweden

|                  | <b>This study,<br/>MIP (nM)</b> | <b>Chen et al (nM)</b> |
|------------------|---------------------------------|------------------------|
| 20-HDoHE         | 9.38 ± 0.01                     | 8.59 ± 0.63            |
| 16-HDoHE         | 5.83 ± 1.27                     | 7.94 ± 0.08            |
| 10-HDoHE         | 3.15 ± 0.23                     | 6.13 ± 0.13            |
| 14-HDoHE         | 3.78 ± 0.16                     | 6.49 ± 0.28            |
| 4-HDoHE          | 4.44 ± 2.02                     | 15.22 ± 0.59           |
| 15-HEPE          | 11.42 ± 0.56                    | 11.26 ± 0.05           |
| 12-HEPE          | 15.25 ± 2.34                    | 11.94 ± 0.45           |
| 18-HEPE          | 2.96 ± 0.08                     | 2.62 ± 0.23            |
| 13-oxoODE        | 10.64 ± 1.62                    | 6.53 ± 0.45            |
| 15-oxoETE        | 22.51 ± 2.01                    | 1.79 ± 0.45            |
| 15-HETrE         | 18.75 ± 1.40                    | 14.30 ± 0.04           |
| 15-HETE          | 25.88 ± 0.34                    | 32.17 ± 2.05           |
| 12-HETE          | 7.33 ± 0.34                     | 11.59 ± 0.42           |
| 5-HETE           | 561.21 ± 15.70                  | 254.18 ± 1.31          |
| 11-HETE          | 272.24 ± 12.47                  | 130.14 ± 1.29          |
| Arachidonic acid | 5979.25 ± 559.94                | 3855.78 ± 52.70        |

**Table S1.** Comparison between the analyte levels obtained with the use of our approach and the ones reported previously [Chen, G.Y. and Q. Zhang, Comprehensive analysis of oxylipins in human plasma using reversed-phase liquid chromatography-triple quadrupole mass spectrometry with heatmap-assisted selection of transitions. Anal Bioanal Chem, 2019. 411(2): p. 367-385] from the same type of biological matrix.

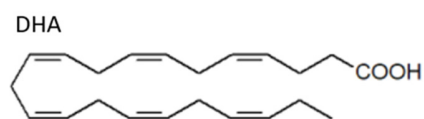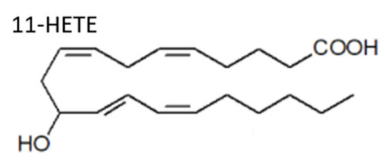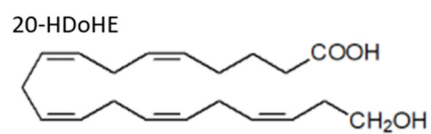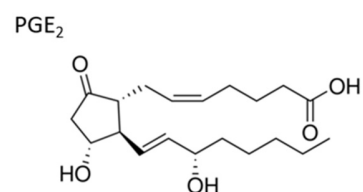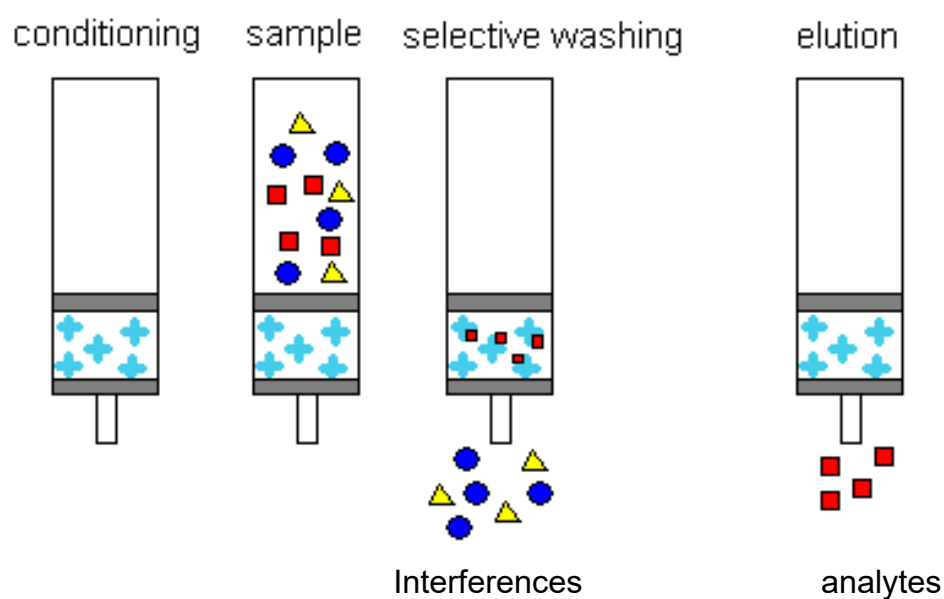

**Figure S1.** Representative chemical structures of oxylipins (DHA, 20-HETE, 20-HDoHE, PGE<sub>2</sub>) and general procedure for their off-line solid phase extraction.

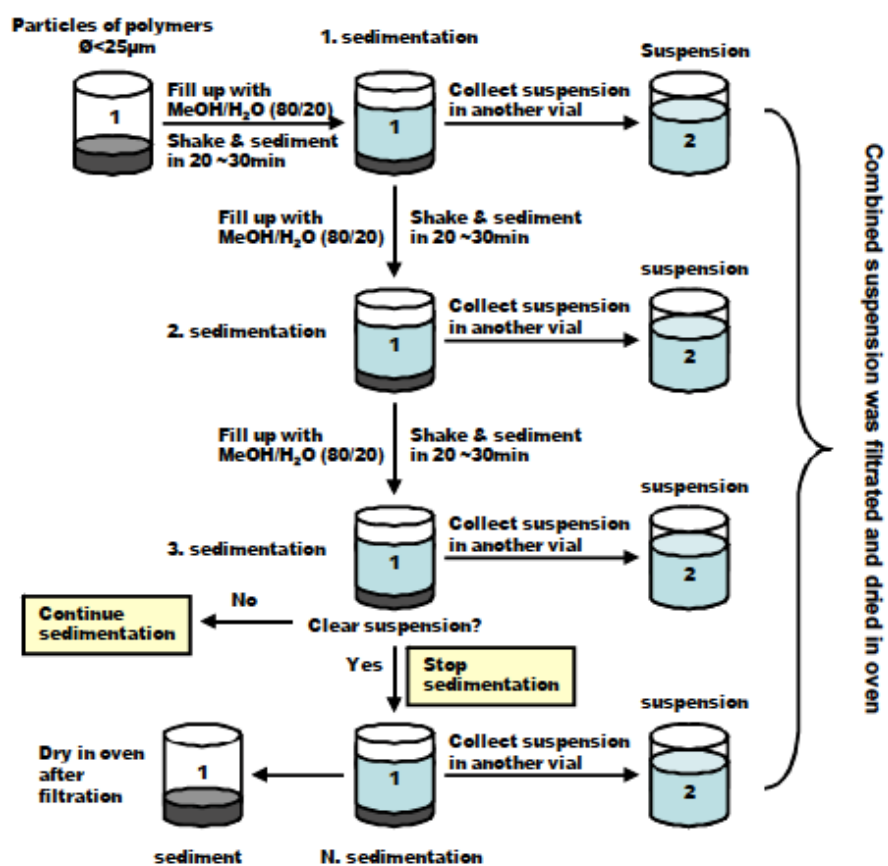

**Figure S2.** The polymer particles subsequently fractionated by repeated sedimentation [23].

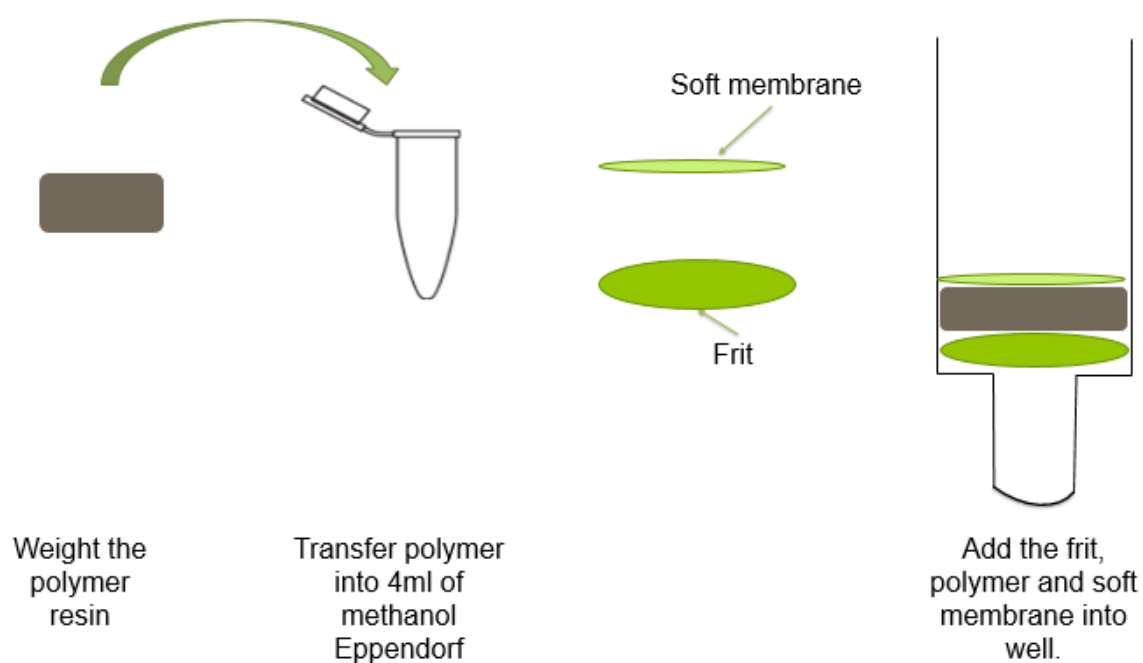

**Figure S3.** The schematic shows the packing of polymer into the cartridge used for the reported experiments.

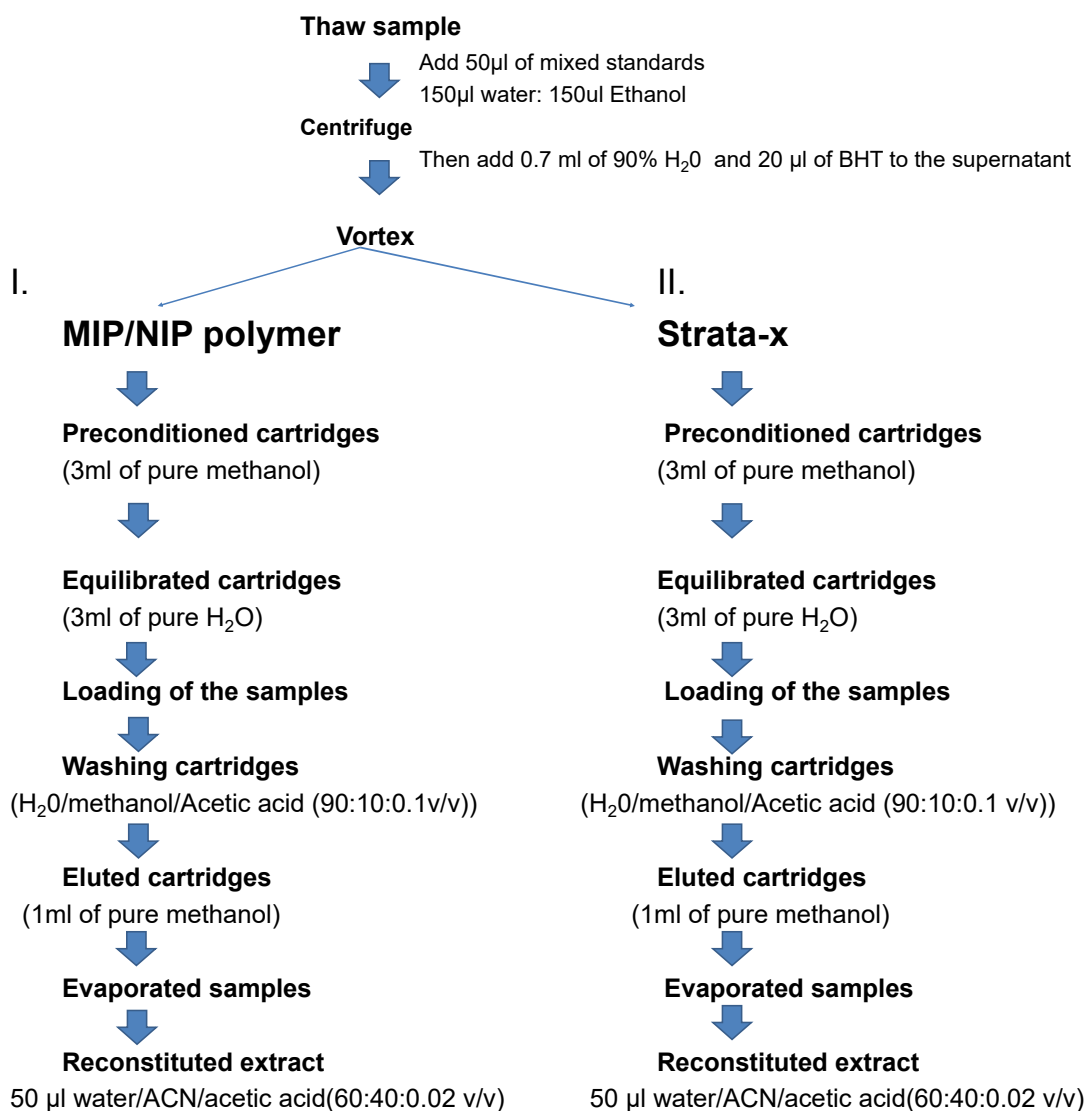

**Figure S4.** Schematic representation of the two distinct solid-phase extraction procedures performed on two separate MIP and NIP-SPE (I) and Strata-X (II) extraction cartridges.

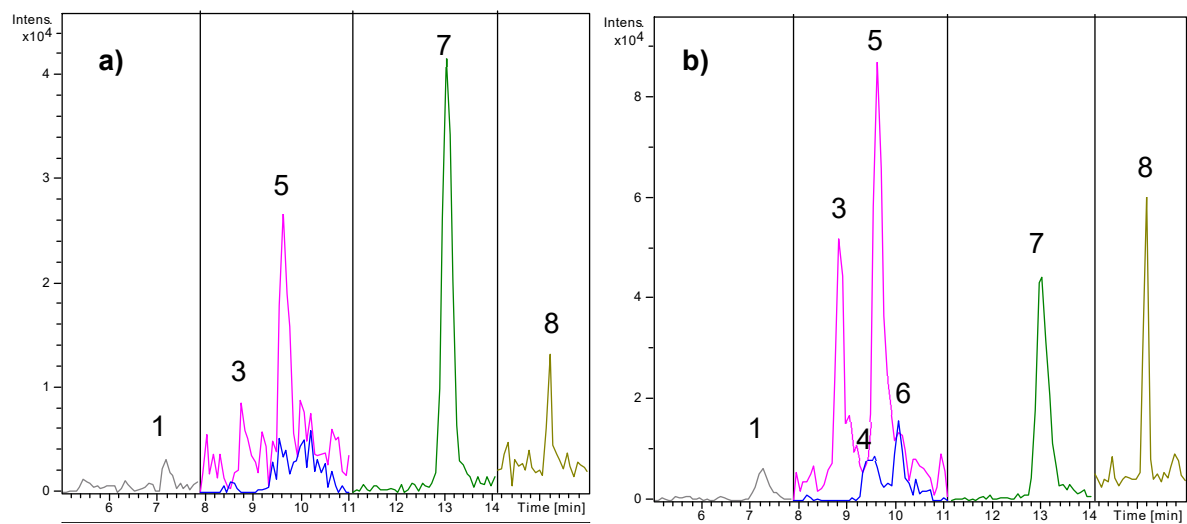

**Figure S5.** Chromatograms of reconstituted wash fractions after washing with 1% MeOH in DCM from MIP (a) and NIP (b). Numbering of PG-peaks was the same as in figure 2.

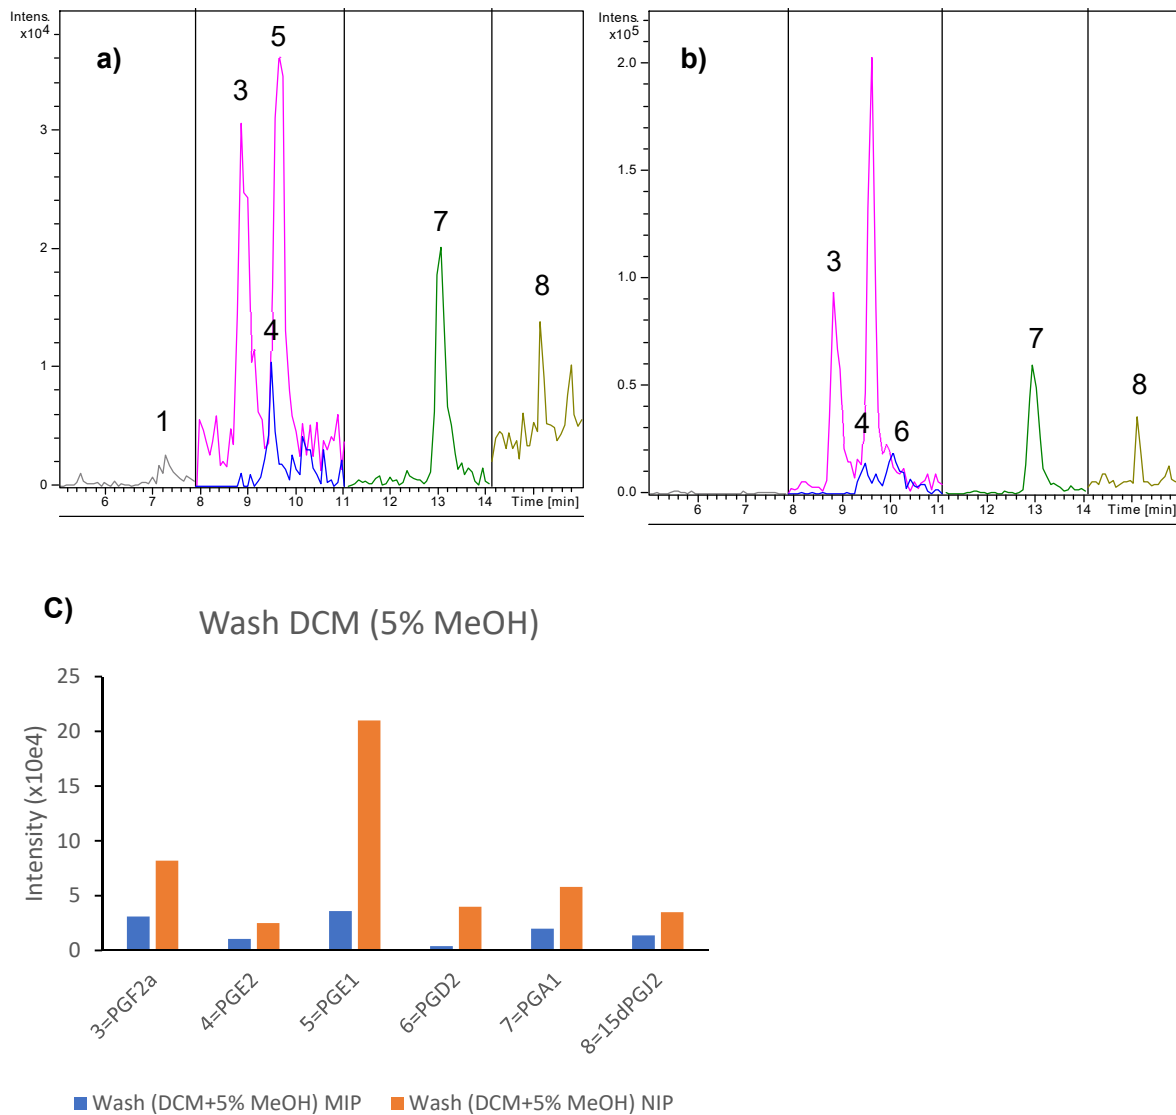

**Figure S6.** Chromatogram of reconstituted Wash fractions after washing with 5% MeOH in DCM from MIP (a) and NIP (b) and corresponding peak intensities of key PGs (c). Numbering of PG-peaks as in figure 2.

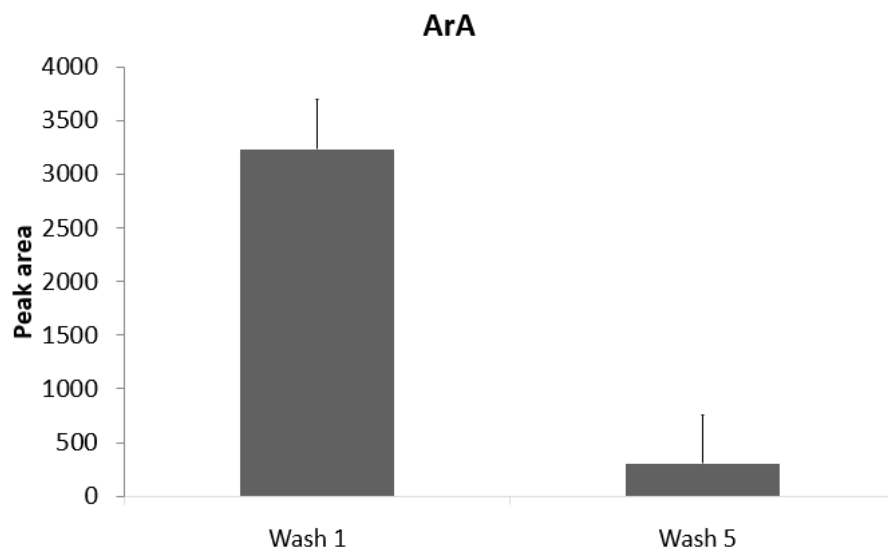

**Figure S7.** Arachidonic acid template (ArA) was used for the synthesis of MIP. After washing the column with 5 ml the template was almost completely removed.



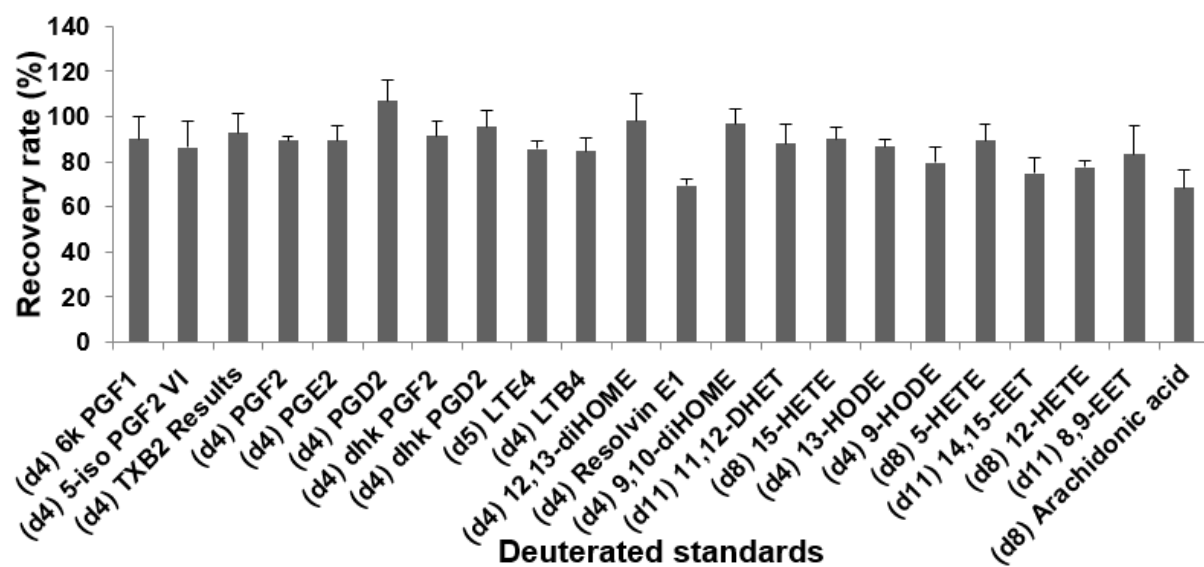

**Figure S8.** Extraction recovery of deuterated standards using Strata-X SPE.

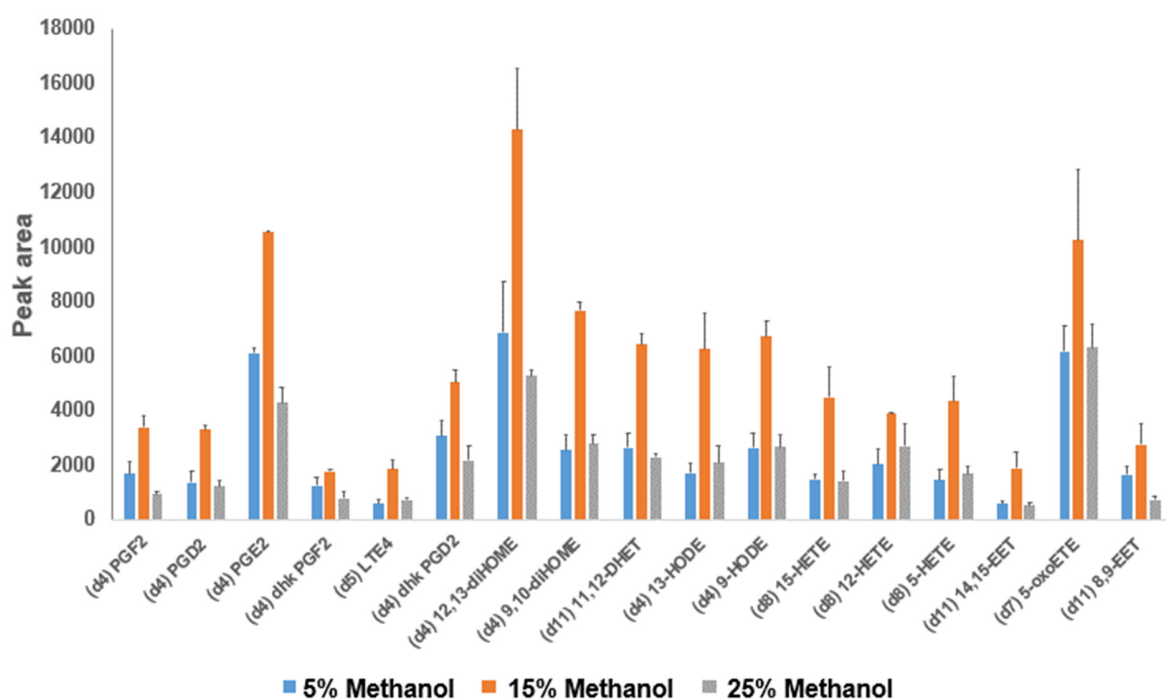

**Figure S9.** Bar charts showing the effect of the washing solvent composition on the recovery of oxylipins using MIP polymer. The data are presented as mean  $\pm$  SD ( $n = 3$ ). SD, Standard deviation.

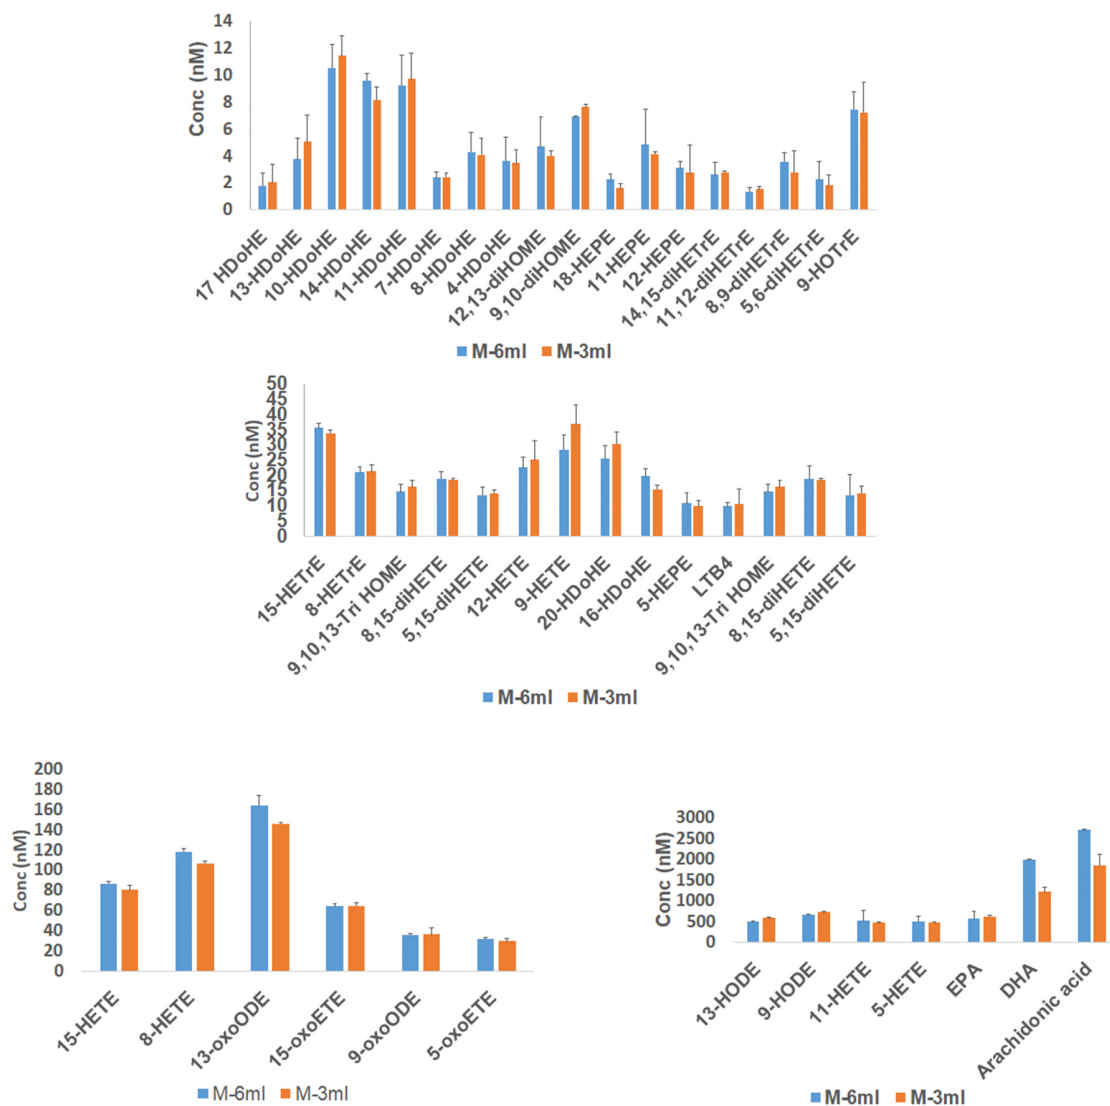

**Figure S10.** Selection of appropriate volume of washing solvent (3ml and 6ml). The data shows that there is no difference in the recovery when the volume of washing solvent increases from 3 ml to 6 ml. Mean  $\pm$  SD were plotted. SD, Standard Deviation.

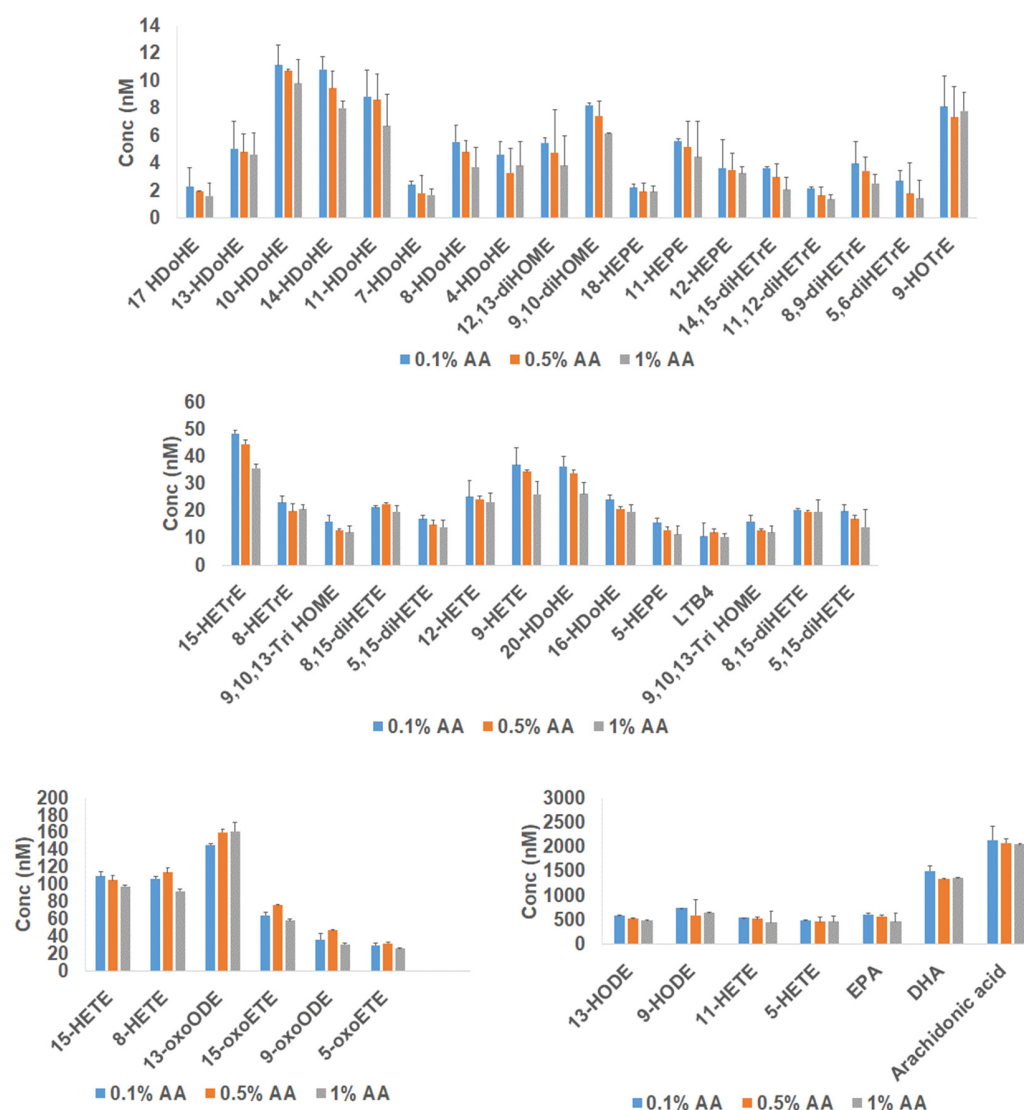

**Figure S11.** Optimization of acidity (0.1 %, 0.5 % and 1% acetic acid) in the Washing solvent composition. Bar charts represent Mean  $\pm$  SD from n = 3. SD; Standard deviation.

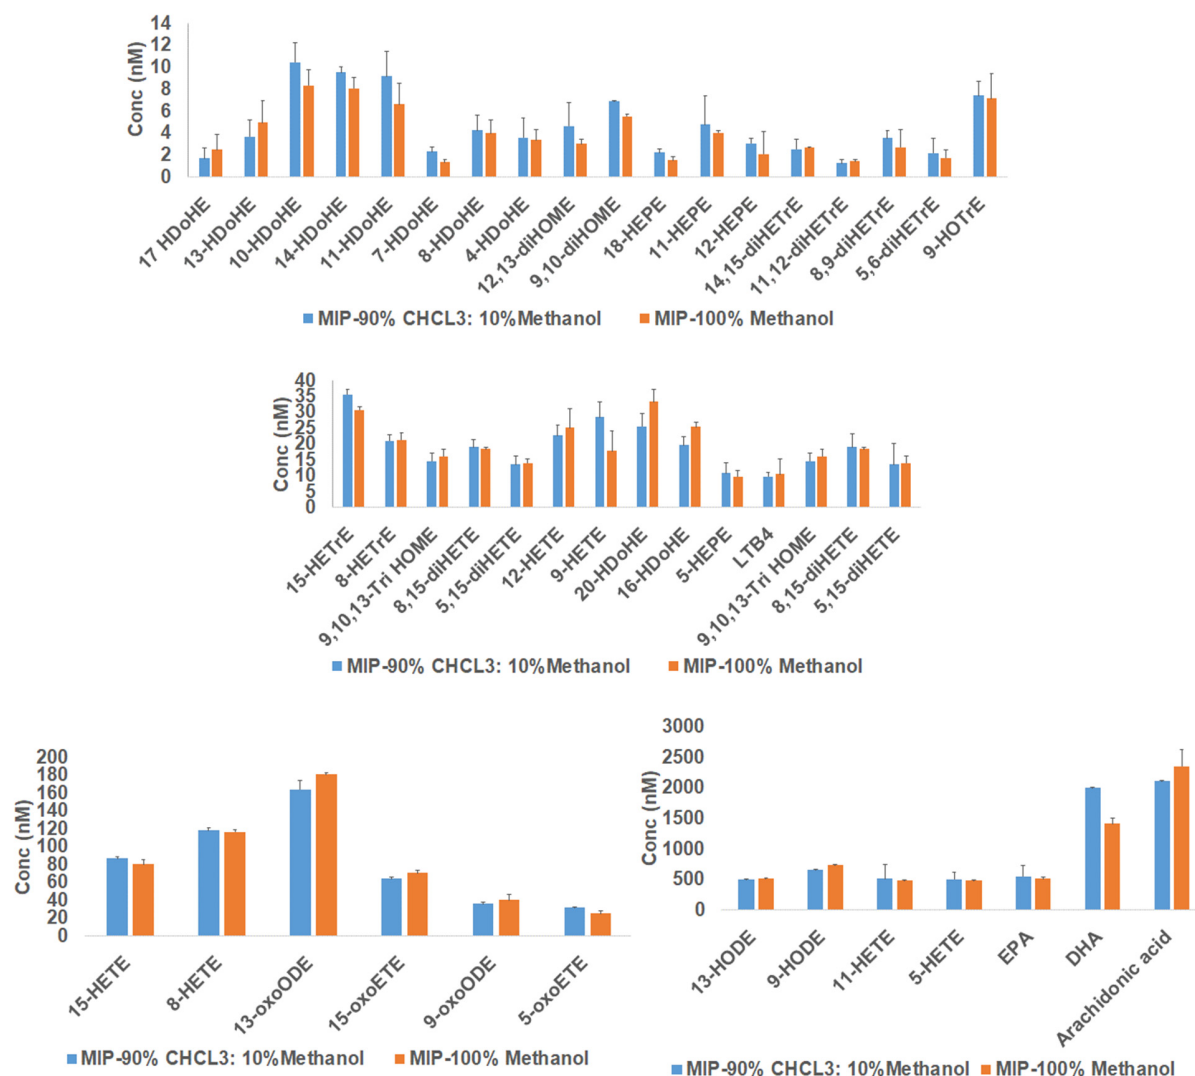

**Figure S12.** Selection of appropriate elution solvent conditions (90% chloroform (CHCl<sub>3</sub>):10%Methanol and 100 %Methanol). The data shows that there is no significant difference in the recovery between the two conditions. Mean  $\pm$  SD were plotted. SD, Standard Deviation.

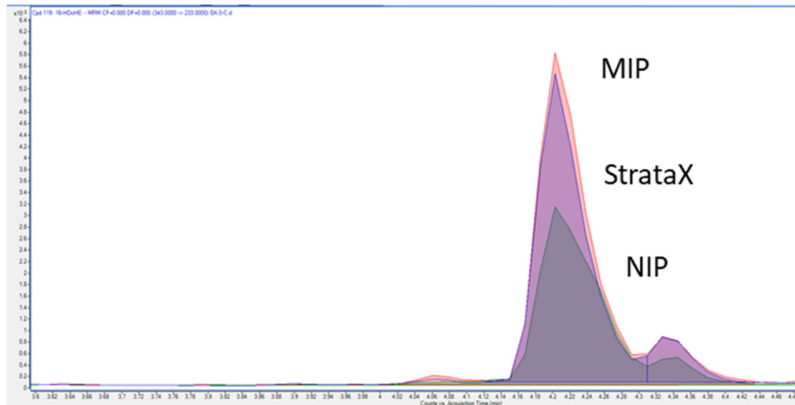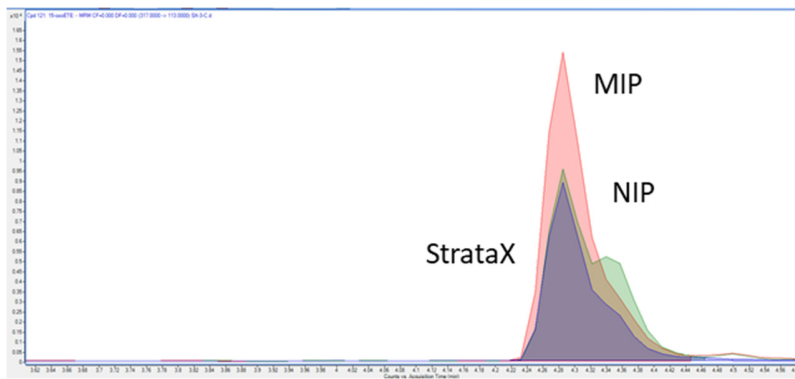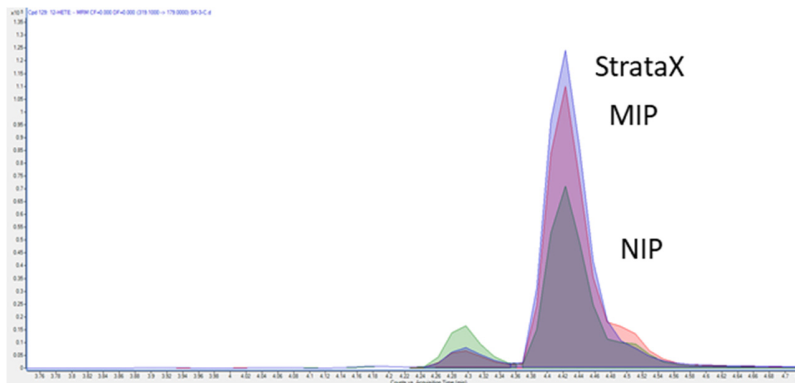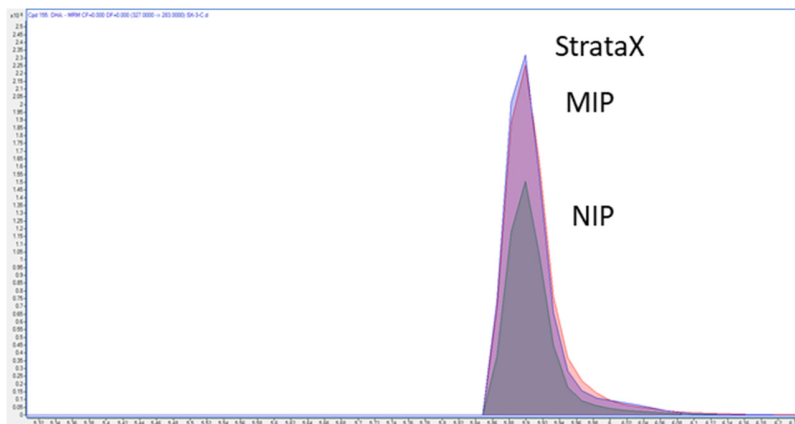

**Figure S13.** Representative chromatograms showing 16-HDoHE (A), 15-oxoETE (B), 12-HETE (C) and DHA (D) enriched with MIP, NIP and Strata-X.

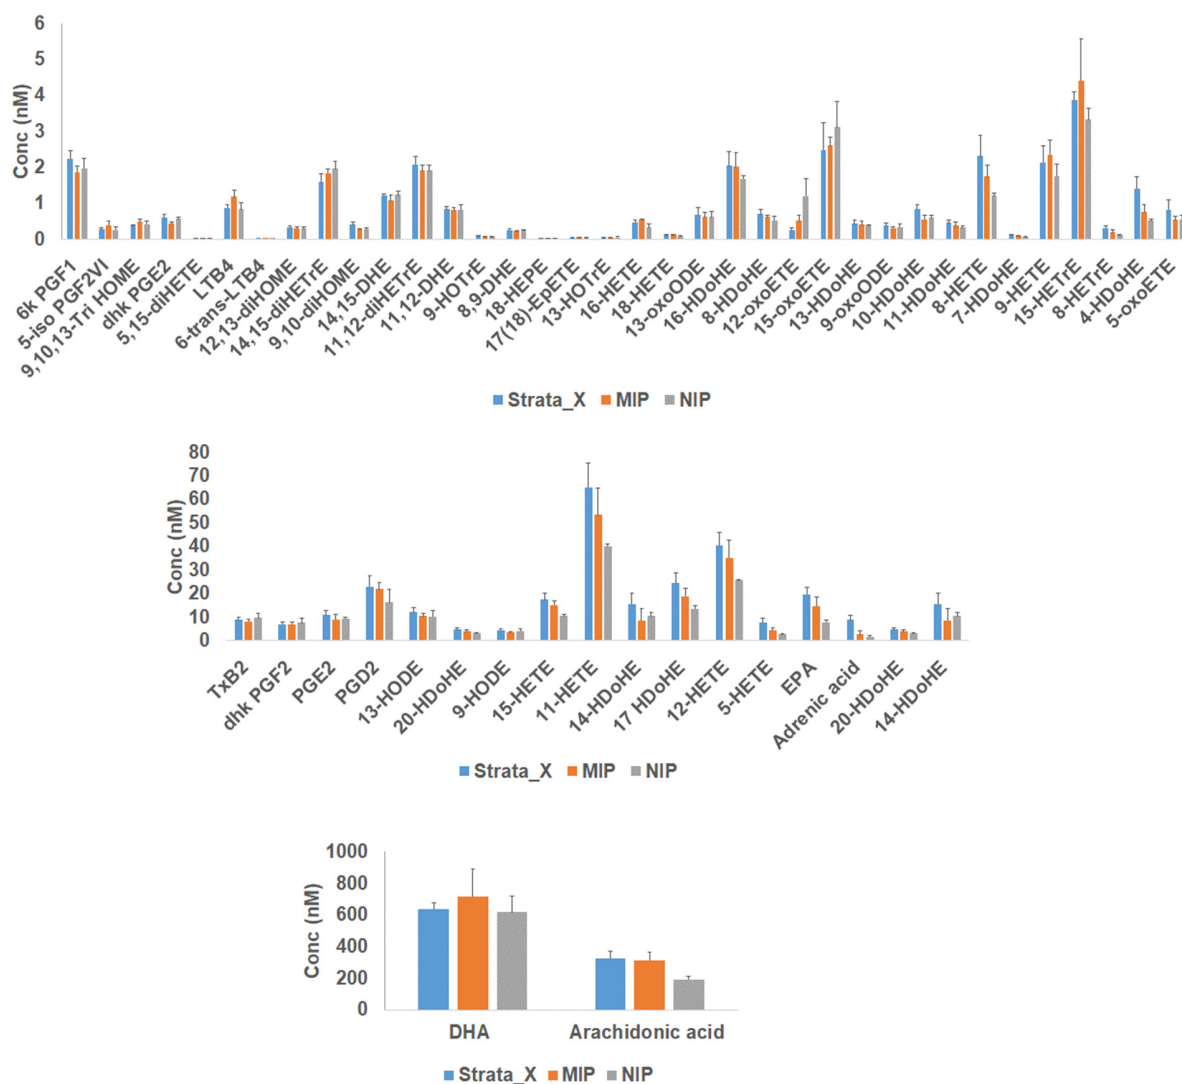

**Figure S14.** Comparison between the oxylipins binding properties of MIP/NIP polymers and commercially available Strata-X when using murine muscle tissue extracts. The results show that MIP have slightly better retention performances than Strata-X and NIP with PGs, HETEs, HDoHEs, HEPEs, oxo-EETs, HETrEs, and PUFAs. The same muscle extracts were used to test all the materials. Bar charts represent Mean  $\pm$  SD from n = 3. SD; Standard deviation.
